# Supplementary material for: Elucidation of hierarchical metallophthalocyanine buffer layers in bulk heterojunction solar cells
Source: Royal Society of Chemistry journal article supplement (doi:10.1039/c6ra26919b), 2017-01-01
Supplement: c6ra26919b1.pdf [file c6ra26919b1.pdf]

Supporting Information

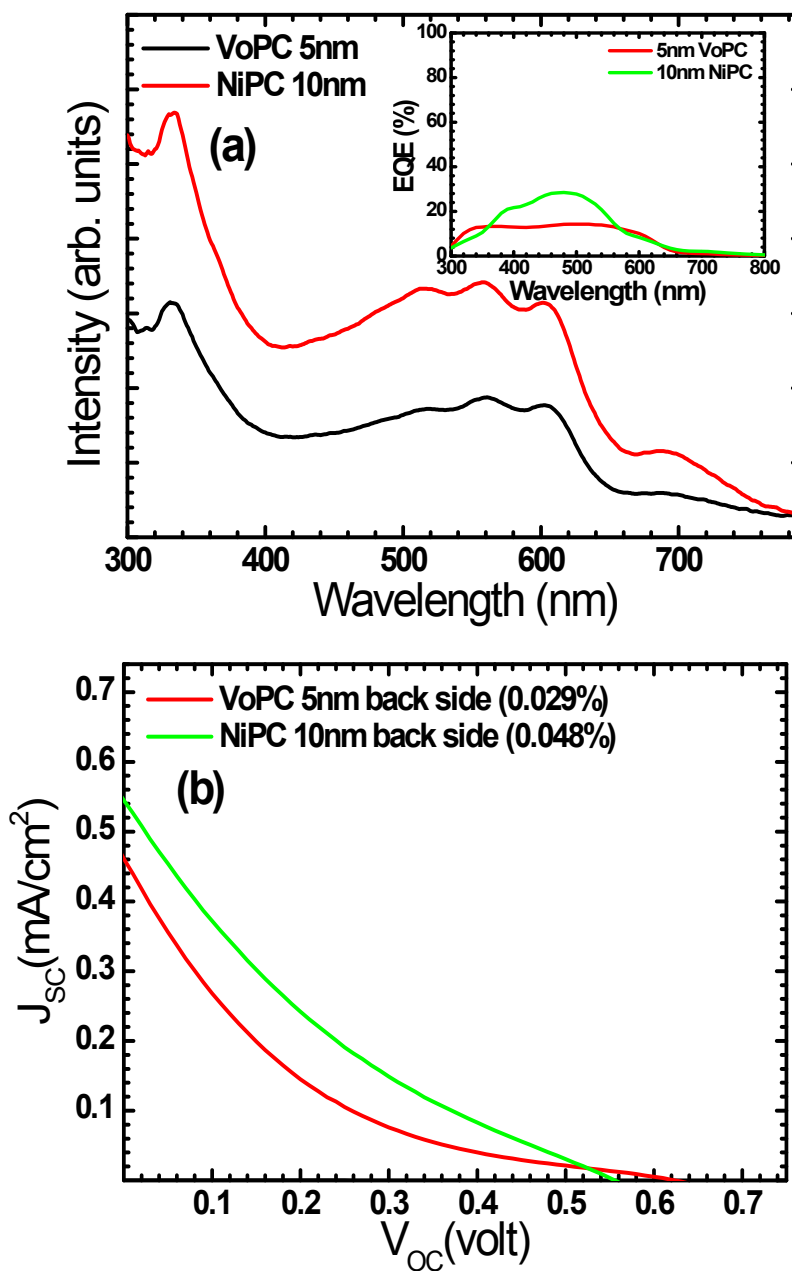

**Fig. S1** (a) UV-visible absorption spectra of filling the representative metallophthalocyanines buffer layers at aluminum cathode side; Inset is EQE study. (b) J-V characteristics of corresponding spectra

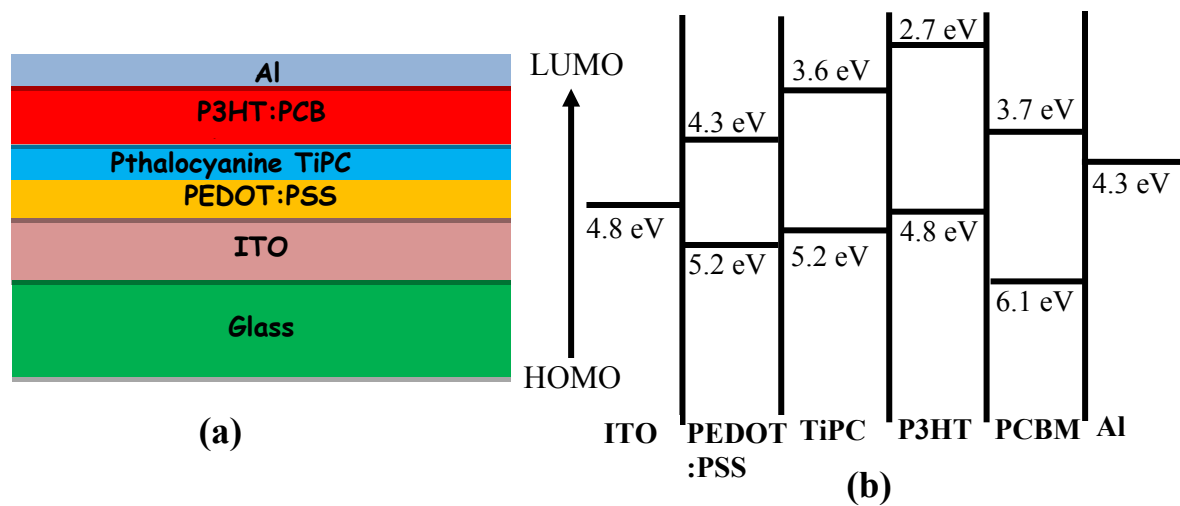

**Fig. S2** (a) Depicts different layers of cell stacking's (b) Band diagram of representative metallophthalocyanines (TiPC) employed in bulk-heterojunction solar cells
